# Supplementary material for: Investigating the adsorption behavior of functional biochar-based porous composite for efficiently removing Cu(ii) in aqueous solution
Source: Royal Society of Chemistry journal article supplement (doi:10.1039/d2nj02384a), 2022-01-01
Supplement: d2nj02384a1.pdf [file d2nj02384a1.pdf]

## Supporting information

### **Investigation the adsorption behavior of functional biochar-based porous composite for efficient removing Cu(II) in aqueous solution**

Jing Li <sup>a</sup>, Keran Li <sup>a, b \*</sup>, Jikang Yan <sup>c \*</sup>, Taigang Zhou <sup>a</sup>

<sup>a</sup> *College of Chemistry and Chemical Engineering, Southwest Petroleum University, Chengdu, 610500, PR China*

<sup>b</sup> *State Key Laboratory of Polymer Materials Engineering, Sichuan University, Chengdu, 610500, PR China*

<sup>c</sup> *School of Engineering, Southwest Petroleum University, Nanchong, 637001, PR China*

*\* corresponding author Tel & Fax: 86-028-83037306; 86-028-83037305*

*\* whom correspondence should be addressed: 8 Xin Du, Southwest Petroleum University, Chengdu, NY 610500.*

*\* E-mail address: [lkkkkkr@163.com](mailto:lkkkkkr@163.com) [yanjk@swpu.edu.cn](mailto:yanjk@swpu.edu.cn)*

#### 1. Factors affecting adsorption

##### 1.1 The standard curve of Cu(II)

The standard curve of Cu (II) was shown in fig. S1. The following standard curve was used for all adsorption capacity calculations.

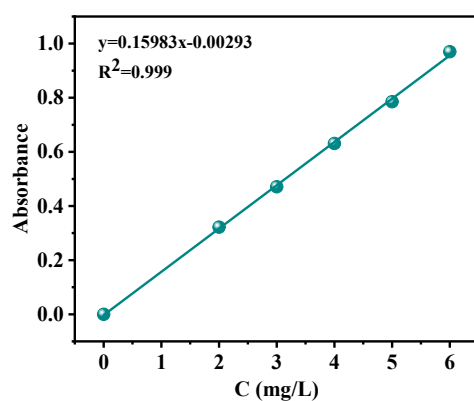

Fig.S1. The standard curve of Cu(II).

## 1.2 Controlled experiment

Fig.S2 showed the adsorption capacity of EDTA-BIOC hydrogels with different content of EDTA (gel-0, gel-1, gel-2, gel-3).

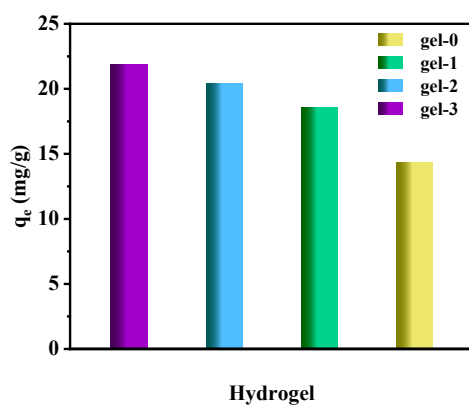

Fig.S2. The adsorption capacity of gel-0, gel-1, gel-2 and gel-3 (Adsorbent dose: 30 mg/L; contact time: 12h, temperature: 298K, pH: 6).
